# Supplementary material
Source: publisher figshare collection journal article supplement (https://acs.figshare.com/ndownloader/files/4762210)
Supplement: Supplementary file 1 [file 4762210]

 
data_sad 
 
_audit_creation_method            SHELXL-97 
_chemical_name_systematic 
; 
 ? 
; 
_chemical_name_common             K2(NH4)2[(MoO2)2O3(C7H7O7)2].6H2O
_chemical_melting_point           ? 
_chemical_formula_moiety          ? 
_chemical_formula_sum 
 'C14 H34 K2 Mo4 N2 O31' 
_chemical_formula_weight          1188.39 
 
loop_ 
 _atom_type_symbol 
 _atom_type_description 
 _atom_type_scat_dispersion_real 
 _atom_type_scat_dispersion_imag 
 _atom_type_scat_source 
 'C'  'C'   0.0033   0.0016 
 'International Tables Vol C Tables 4.2.6.8 and 6.1.1.4' 
 'H'  'H'   0.0000   0.0000 
 'International Tables Vol C Tables 4.2.6.8 and 6.1.1.4' 
 'N'  'N'   0.0061   0.0033 
 'International Tables Vol C Tables 4.2.6.8 and 6.1.1.4' 
 'O'  'O'   0.0106   0.0060 
 'International Tables Vol C Tables 4.2.6.8 and 6.1.1.4' 
 'K'  'K'   0.2009   0.2494 
 'International Tables Vol C Tables 4.2.6.8 and 6.1.1.4' 
 'Mo'  'Mo'  -1.6832   0.6857 
 'International Tables Vol C Tables 4.2.6.8 and 6.1.1.4' 
 
_symmetry_cell_setting            ? 
_symmetry_space_group_name_H-M    ? 
 
loop_ 
 _symmetry_equiv_pos_as_xyz 
 'x, y, z' 
 '-x, y+1/2, -z+1/2' 
 '-x, -y, -z' 
 'x, -y-1/2, z-1/2' 
 
_cell_length_a                    11.6965(5) 
_cell_length_b                    15.2089(6) 
_cell_length_c                    22.1252(9) 
_cell_angle_alpha                 90.00 
_cell_angle_beta                  101.4240(10) 
_cell_angle_gamma                 90.00 
_cell_volume                      3857.9(3) 
_cell_formula_units_Z             4 
_cell_measurement_temperature     296(2) 
_cell_measurement_reflns_used     ? 
_cell_measurement_theta_min       ? 
_cell_measurement_theta_max       ? 
 
_exptl_crystal_description        ? 
_exptl_crystal_colour             ? 
_exptl_crystal_size_max           0.35 
_exptl_crystal_size_mid           0.17 
_exptl_crystal_size_min           0.14 
_exptl_crystal_density_meas       ? 
_exptl_crystal_density_diffrn     2.046 
_exptl_crystal_density_method     'not measured' 
_exptl_crystal_F_000              2344 
_exptl_absorpt_coefficient_mu     1.589 
_exptl_absorpt_correction_type    ? 
_exptl_absorpt_correction_T_min   0.6062 
_exptl_absorpt_correction_T_max   0.8081 
_exptl_absorpt_process_details    ? 
 
_exptl_special_details 
; 
 ? 
; 
 
_diffrn_ambient_temperature       296(2) 
_diffrn_radiation_wavelength      0.71073 
_diffrn_radiation_type            MoK\a 
_diffrn_radiation_source          'fine-focus sealed tube' 
_diffrn_radiation_monochromator   graphite 
_diffrn_measurement_device_type   BRUKER-APEX-CCD 
_diffrn_measurement_method        ? 
_diffrn_detector_area_resol_mean  ? 
_diffrn_standards_number          ? 
_diffrn_standards_interval_count  ? 
_diffrn_standards_interval_time   ? 
_diffrn_standards_decay_%         ? 
_diffrn_reflns_number             44039 
_diffrn_reflns_av_R_equivalents   0.0837 
_diffrn_reflns_av_sigmaI/netI     0.0435 
_diffrn_reflns_limit_h_min        -15 
_diffrn_reflns_limit_h_max        15 
_diffrn_reflns_limit_k_min        -19 
_diffrn_reflns_limit_k_max        20 
_diffrn_reflns_limit_l_min        -29 
_diffrn_reflns_limit_l_max        28 
_diffrn_reflns_theta_min          1.64 
_diffrn_reflns_theta_max          28.37 
_reflns_number_total              9215 
_reflns_number_gt                 8135 
_reflns_threshold_expression      >2sigma(I) 
 
_computing_data_collection        ? 
_computing_cell_refinement        ? 
_computing_data_reduction         ? 
_computing_structure_solution     'SHELXS-97 (Sheldrick, 1990)' 
_computing_structure_refinement   'SHELXL-97 (Sheldrick, 1997)' 
_computing_molecular_graphics     ? 
_computing_publication_material   ? 
 
_refine_special_details 
; 
 Refinement of F^2^ against ALL reflections.  The weighted R-factor wR and 
 goodness of fit S are based on F^2^, conventional R-factors R are based 
 on F, with F set to zero for negative F^2^. The threshold expression of 
 F^2^ > 2sigma(F^2^) is used only for calculating R-factors(gt) etc. and is 
 not relevant to the choice of reflections for refinement.  R-factors based 
 on F^2^ are statistically about twice as large as those based on F, and R- 
 factors based on ALL data will be even larger. 
; 
 
_refine_ls_structure_factor_coef  Fsqd  
_refine_ls_matrix_type            full 
_refine_ls_weighting_scheme       calc  
_refine_ls_weighting_details 
 'calc w=1/[\s^2^(Fo^2^)+(0.0925P)^2^+11.9292P] where P=(Fo^2^+2Fc^2^)/3' 
_atom_sites_solution_primary      direct 
_atom_sites_solution_secondary    difmap 
_atom_sites_solution_hydrogens    geom 
_refine_ls_hydrogen_treatment     mixed 
_refine_ls_extinction_method      none 
_refine_ls_extinction_coef        ? 
_refine_ls_number_reflns          9215 
_refine_ls_number_parameters      568 
_refine_ls_number_restraints      34 
_refine_ls_R_factor_all           0.0481 
_refine_ls_R_factor_gt            0.0436 
_refine_ls_wR_factor_ref          0.1434 
_refine_ls_wR_factor_gt           0.1398 
_refine_ls_goodness_of_fit_ref    0.959 
_refine_ls_restrained_S_all       1.113 
_refine_ls_shift/su_max           2.142 
_refine_ls_shift/su_mean          0.081 
 
loop_ 
 _atom_site_label 
 _atom_site_type_symbol 
 _atom_site_fract_x 
 _atom_site_fract_y 
 _atom_site_fract_z 
 _atom_site_U_iso_or_equiv 
 _atom_site_adp_type 
 _atom_site_occupancy 
 _atom_site_symmetry_multiplicity 
 _atom_site_calc_flag 
 _atom_site_refinement_flags 
 _atom_site_disorder_assembly 
 _atom_site_disorder_group 
Mo1 Mo 0.48091(4) 0.12296(3) 0.90804(2) 0.02960(13) Uani 1 1 d . . . 
Mo2 Mo 0.49681(4) 0.20869(4) 0.76959(2) 0.03643(14) Uani 1 1 d . . . 
Mo3 Mo 0.80287(4) 0.22933(3) 0.76364(2) 0.03354(14) Uani 1 1 d . . . 
Mo4 Mo 0.94675(4) 0.08666(3) 0.869127(19) 0.02726(13) Uani 1 1 d . . . 
O1 O 0.5866(3) 0.1650(2) 0.98050(16) 0.0308(7) Uani 1 1 d . . . 
O2 O 0.4280(4) 0.2593(3) 0.9200(2) 0.0407(9) Uani 1 1 d . . . 
O3 O 0.5052(5) 0.3871(3) 0.9554(3) 0.0597(13) Uani 1 1 d . . . 
O4 O 0.6141(3) 0.2041(2) 0.86549(17) 0.0303(7) Uani 1 1 d . . . 
O5 O 0.7745(3) 0.2771(3) 0.85907(18) 0.0348(8) Uani 1 1 d . . . 
O6 O 0.5490(4) 0.1236(3) 1.1111(2) 0.0492(11) Uani 1 1 d D . . 
H6 H 0.527(7) 0.071(2) 1.103(4) 0.059 Uiso 1 1 d D . . 
O7 O 0.3776(4) 0.1755(4) 1.0633(2) 0.0553(12) Uani 1 1 d . . . 
O8 O 0.3616(4) 0.0820(4) 0.9322(2) 0.0497(12) Uani 1 1 d . . . 
O9 O 0.5624(4) 0.0294(3) 0.90231(18) 0.0370(8) Uani 1 1 d . . . 
O10 O 0.4159(3) 0.1442(3) 0.82466(18) 0.0361(8) Uani 1 1 d . . . 
O11 O 0.8787(3) -0.0292(2) 0.87681(16) 0.0289(7) Uani 1 1 d . . . 
O12 O 0.9660(3) 0.0145(3) 0.78653(19) 0.0369(9) Uani 1 1 d . . . 
O13 O 0.8789(5) -0.0876(3) 0.7224(2) 0.0496(11) Uani 1 1 d . . . 
O14 O 0.7632(3) 0.0987(3) 0.80689(17) 0.0309(7) Uani 1 1 d . . . 
O15 O 0.5770(3) 0.0695(3) 0.76926(18) 0.0358(8) Uani 1 1 d . . . 
O16 O 0.9795(4) -0.1783(4) 0.9619(2) 0.0508(11) Uani 1 1 d D . . 
H16 H 1.025(6) -0.159(5) 0.994(2) 0.061 Uiso 1 1 d D . . 
O17 O 1.1231(4) -0.1242(3) 0.9204(2) 0.0467(10) Uani 1 1 d . . . 
O18 O 0.4546(5) 0.3118(4) 0.7853(3) 0.0590(13) Uani 1 1 d . . . 
O19 O 0.4092(4) 0.1820(4) 0.7015(2) 0.0569(13) Uani 1 1 d . . . 
O20 O 0.6391(4) 0.2404(3) 0.74523(19) 0.0419(10) Uani 1 1 d . . . 
O21 O 0.9440(3) 0.1880(3) 0.82097(18) 0.0324(8) Uani 1 1 d . . . 
O22 O 0.8231(4) 0.1755(4) 0.6993(2) 0.0506(11) Uani 1 1 d . . . 
O23 O 0.8472(4) 0.3340(3) 0.7528(2) 0.0473(11) Uani 1 1 d . . . 
O24 O 1.0927(3) 0.0759(3) 0.8977(2) 0.0425(10) Uani 1 1 d . . . 
O25 O 0.8932(4) 0.1238(3) 0.93188(17) 0.0353(8) Uani 1 1 d . . . 
C1 C 0.6144(5) 0.2554(4) 0.9860(2) 0.0312(10) Uani 1 1 d . . . 
C2 C 0.5082(5) 0.3071(4) 0.9519(3) 0.0384(12) Uani 1 1 d . . . 
C3 C 0.7187(5) 0.2749(4) 0.9562(3) 0.0346(11) Uani 1 1 d . . . 
H3A H 0.7362 0.3372 0.9606 0.042 Uiso 1 1 calc R . . 
H3B H 0.7858 0.2432 0.9786 0.042 Uiso 1 1 calc R . . 
C4 C 0.7021(5) 0.2511(3) 0.8890(2) 0.0297(10) Uani 1 1 d . . . 
C5 C 0.6437(6) 0.2792(4) 1.0548(3) 0.0380(12) Uani 1 1 d . . . 
H5A H 0.7035 0.2393 1.0755 0.046 Uiso 1 1 calc R . . 
H5B H 0.6759 0.3382 1.0590 0.046 Uiso 1 1 calc R . . 
C6 C 0.5397(6) 0.2753(4) 1.0871(3) 0.0439(14) Uani 1 1 d . . . 
H6A H 0.5662 0.2918 1.1300 0.053 Uiso 1 1 calc R . . 
H6B H 0.4827 0.3186 1.0684 0.053 Uiso 1 1 calc R . . 
C7 C 0.4809(6) 0.1875(4) 1.0849(3) 0.0411(13) Uani 1 1 d . . . 
C11 C 0.8297(4) -0.0762(3) 0.8226(2) 0.0301(10) Uani 1 1 d . . . 
C12 C 0.8958(5) -0.0496(4) 0.7721(2) 0.0334(11) Uani 1 1 d . . . 
C13 C 0.7012(5) -0.0513(4) 0.8023(3) 0.0344(11) Uani 1 1 d . . . 
H13A H 0.6696 -0.0823 0.7644 0.041 Uiso 1 1 calc R . . 
H13B H 0.6594 -0.0717 0.8334 0.041 Uiso 1 1 calc R . . 
C14 C 0.6781(4) 0.0446(4) 0.7922(2) 0.0299(10) Uani 1 1 d . . . 
C15 C 0.8414(5) -0.1737(4) 0.8369(3) 0.0358(11) Uani 1 1 d . . . 
H15A H 0.8047 -0.2067 0.8007 0.043 Uiso 1 1 calc R . . 
H15B H 0.8005 -0.1873 0.8698 0.043 Uiso 1 1 calc R . . 
C16 C 0.9688(6) -0.2027(4) 0.8561(3) 0.0419(13) Uani 1 1 d . . . 
H16A H 0.9711 -0.2662 0.8602 0.050 Uiso 1 1 calc R . . 
H16B H 1.0098 -0.1872 0.8236 0.050 Uiso 1 1 calc R . . 
C17 C 1.0314(5) -0.1633(4) 0.9148(3) 0.0379(12) Uani 1 1 d . . . 
K1 K 0.77407(17) 0.46991(14) 0.66881(9) 0.0661(5) Uani 1 1 d . . . 
K2 K 0.7671(3) -0.0125(2) 0.98507(13) 0.1080(10) Uani 1 1 d . . . 
O1W O 0.6226(5) 0.4541(4) 0.7521(4) 0.0750(17) Uani 1 1 d D . . 
H1W1 H 0.567(5) 0.489(4) 0.739(5) 0.090 Uiso 1 1 d D . . 
H1W2 H 0.597(7) 0.404(3) 0.760(5) 0.090 Uiso 1 1 d D . . 
O2W O 0.8495(8) -0.3768(6) 0.7476(5) 0.098(2) Uani 1 1 d D . . 
H2W1 H 0.827(12) -0.379(7) 0.782(3) 0.118 Uiso 1 1 d D . . 
H2W2 H 0.839(12) -0.326(4) 0.732(5) 0.118 Uiso 1 1 d D . . 
O3W O 0.3189(13) 0.4786(9) 0.9935(8) 0.187(6) Uani 1 1 d D . . 
H3W1 H 0.240(8) 0.494(14) 1.000(7) 0.224 Uiso 1 1 d D . . 
H3W2 H 0.328(15) 0.477(14) 0.945(6) 0.224 Uiso 1 1 d D . . 
O4W O 0.988(2) 0.0929(11) 0.5247(9) 0.109(6) Uani 0.50 1 d PD . . 
H4W1 H 1.062(10) 0.072(11) 0.536(13) 0.130 Uiso 0.50 1 d PD . . 
H4W2 H 0.934(11) 0.044(13) 0.533(13) 0.130 Uiso 0.50 1 d PD . . 
O5W O 0.7920(14) -0.2304(16) 0.5272(11) 0.135(9) Uani 0.50 1 d P . . 
O6W O 1.030(2) -0.095(2) 0.6313(11) 0.189(17) Uani 0.50 1 d P . . 
O7W O 0.988(2) -0.154(2) 0.5828(12) 0.148(10) Uani 0.50 1 d P . . 
O8W O 0.780(2) -0.464(2) 0.8492(11) 0.152(12) Uani 0.40 1 d P . . 
O9W O 0.378(3) 0.502(2) 0.8667(11) 0.115(11) Uani 0.30 1 d P . . 
O10W O 0.768(2) -0.164(2) 0.451(2) 0.134(16) Uani 0.30 1 d P . . 
N1 N 0.8025(5) -0.2411(5) 0.6565(3) 0.0624(18) Uani 1 1 d D . . 
H1 H 0.810(6) -0.233(4) 0.6193(12) 0.075 Uiso 1 1 d D . . 
H2 H 0.743(4) -0.273(4) 0.657(3) 0.075 Uiso 1 1 d D . . 
H3 H 0.795(6) -0.192(2) 0.673(3) 0.075 Uiso 1 1 d D . . 
H4 H 0.863(4) -0.267(4) 0.676(3) 0.075 Uiso 1 1 d D . . 
N2 N 0.8689(15) 0.0418(11) 0.6178(7) 0.180(8) Uani 1 1 d D . . 
H7 H 0.943(7) 0.029(11) 0.637(6) 0.216 Uiso 1 1 d D . . 
H8 H 0.871(13) 0.057(11) 0.577(4) 0.216 Uiso 1 1 d D . . 
H9 H 0.845(13) 0.085(7) 0.636(6) 0.216 Uiso 1 1 d D . . 
H10 H 0.822(10) -0.003(8) 0.619(7) 0.216 Uiso 1 1 d D . . 
 
loop_ 
 _atom_site_aniso_label 
 _atom_site_aniso_U_11 
 _atom_site_aniso_U_22 
 _atom_site_aniso_U_33 
 _atom_site_aniso_U_23 
 _atom_site_aniso_U_13 
 _atom_site_aniso_U_12 
Mo1 0.0252(2) 0.0378(3) 0.0268(2) 0.00070(16) 0.00763(17) -0.00298(16) 
Mo2 0.0278(2) 0.0529(3) 0.0279(2) 0.01070(19) 0.00383(18) 0.00882(19) 
Mo3 0.0313(2) 0.0429(3) 0.0280(2) 0.00953(18) 0.00988(18) 0.00095(18) 
Mo4 0.0230(2) 0.0324(2) 0.0255(2) -0.00142(15) 0.00278(16) -0.00079(15) 
O1 0.0326(18) 0.0339(19) 0.0260(17) 0.0018(14) 0.0060(14) -0.0010(15) 
O2 0.033(2) 0.049(2) 0.040(2) 0.0018(18) 0.0062(17) 0.0093(18) 
O3 0.071(4) 0.039(2) 0.067(3) 0.001(2) 0.009(3) 0.012(2) 
O4 0.0280(17) 0.0375(19) 0.0260(17) 0.0032(14) 0.0069(14) 0.0000(14) 
O5 0.035(2) 0.040(2) 0.033(2) 0.0008(15) 0.0133(16) -0.0049(16) 
O6 0.051(3) 0.046(3) 0.047(3) 0.010(2) 0.002(2) -0.007(2) 
O7 0.045(3) 0.064(3) 0.059(3) 0.008(2) 0.014(2) -0.001(2) 
O8 0.037(2) 0.072(3) 0.042(2) -0.001(2) 0.0156(19) -0.018(2) 
O9 0.042(2) 0.035(2) 0.033(2) 0.0007(16) 0.0056(16) -0.0017(16) 
O10 0.0248(17) 0.054(2) 0.0283(18) 0.0021(16) 0.0029(14) 0.0002(16) 
O11 0.0293(17) 0.0307(17) 0.0260(17) -0.0024(14) 0.0038(14) -0.0034(14) 
O12 0.0324(19) 0.045(2) 0.037(2) -0.0068(17) 0.0147(16) -0.0048(16) 
O13 0.057(3) 0.059(3) 0.034(2) -0.014(2) 0.012(2) -0.009(2) 
O14 0.0237(17) 0.0370(19) 0.0310(19) 0.0033(15) 0.0026(14) -0.0014(14) 
O15 0.0232(17) 0.049(2) 0.033(2) -0.0019(17) 0.0015(14) 0.0009(16) 
O16 0.052(3) 0.066(3) 0.032(2) 0.001(2) 0.0034(19) -0.015(2) 
O17 0.035(2) 0.056(3) 0.049(3) 0.003(2) 0.0062(19) -0.0001(19) 
O18 0.061(3) 0.058(3) 0.059(3) 0.021(2) 0.016(2) 0.027(2) 
O19 0.036(2) 0.102(4) 0.030(2) 0.012(2) -0.0005(18) 0.004(2) 
O20 0.034(2) 0.057(3) 0.034(2) 0.0186(19) 0.0064(16) 0.0038(18) 
O21 0.0273(18) 0.0369(19) 0.0340(19) 0.0028(15) 0.0083(15) -0.0041(15) 
O22 0.049(3) 0.074(3) 0.030(2) 0.003(2) 0.0130(19) 0.001(2) 
O23 0.047(2) 0.048(2) 0.051(3) 0.020(2) 0.019(2) 0.000(2) 
O24 0.0267(19) 0.048(2) 0.048(2) -0.0028(19) -0.0019(17) 0.0002(17) 
O25 0.043(2) 0.037(2) 0.0263(18) -0.0030(15) 0.0065(16) 0.0010(16) 
C1 0.032(3) 0.034(3) 0.029(3) -0.001(2) 0.009(2) -0.001(2) 
C2 0.041(3) 0.042(3) 0.035(3) 0.001(2) 0.014(2) 0.008(2) 
C3 0.034(3) 0.039(3) 0.032(3) -0.005(2) 0.011(2) -0.006(2) 
C4 0.028(2) 0.030(2) 0.032(3) 0.0029(19) 0.009(2) 0.0029(19) 
C5 0.045(3) 0.042(3) 0.028(3) -0.003(2) 0.011(2) -0.006(2) 
C6 0.057(4) 0.045(3) 0.035(3) -0.004(2) 0.022(3) -0.003(3) 
C7 0.045(3) 0.047(3) 0.035(3) 0.001(2) 0.018(3) -0.001(3) 
C11 0.027(2) 0.035(3) 0.028(2) -0.006(2) 0.0048(19) -0.003(2) 
C12 0.030(3) 0.040(3) 0.030(3) -0.001(2) 0.007(2) 0.004(2) 
C13 0.025(2) 0.041(3) 0.037(3) -0.006(2) 0.004(2) -0.004(2) 
C14 0.023(2) 0.044(3) 0.024(2) -0.002(2) 0.0063(18) -0.002(2) 
C15 0.037(3) 0.034(3) 0.034(3) -0.004(2) 0.003(2) -0.002(2) 
C16 0.044(3) 0.042(3) 0.038(3) -0.005(2) 0.004(3) 0.009(3) 
C17 0.037(3) 0.038(3) 0.038(3) 0.004(2) 0.004(2) 0.008(2) 
K1 0.0609(10) 0.0717(11) 0.0671(11) 0.0165(9) 0.0158(8) 0.0022(8) 
K2 0.0875(17) 0.154(3) 0.0798(16) 0.0220(17) 0.0098(13) -0.0256(18) 
O1W 0.053(3) 0.064(4) 0.110(5) 0.010(4) 0.019(3) 0.009(3) 
O2W 0.097(6) 0.100(6) 0.110(6) -0.020(5) 0.047(5) 0.012(5) 
O3W 0.168(12) 0.123(9) 0.279(19) 0.011(11) 0.066(13) 0.042(9) 
O4W 0.138(16) 0.078(10) 0.109(13) 0.003(9) 0.022(12) 0.032(10) 
O5W 0.056(8) 0.19(2) 0.17(2) -0.106(17) 0.045(11) -0.028(10) 
O6W 0.147(19) 0.34(4) 0.109(15) 0.13(2) 0.083(15) 0.18(2) 
O7W 0.126(17) 0.21(3) 0.109(16) 0.058(17) 0.024(14) 0.081(17) 
O8W 0.110(18) 0.24(3) 0.086(15) 0.042(18) -0.018(13) -0.05(2) 
O9W 0.18(3) 0.11(2) 0.049(12) -0.003(12) 0.007(15) 0.06(2) 
O10W 0.059(14) 0.14(3) 0.22(4) -0.11(3) 0.056(19) -0.027(15) 
N1 0.040(3) 0.063(4) 0.076(4) -0.030(3) -0.008(3) -0.007(3) 
N2 0.181(15) 0.203(17) 0.140(12) -0.090(12) -0.010(11) 0.071(13) 
 
_geom_special_details 
; 
 All esds (except the esd in the dihedral angle between two l.s. planes) 
 are estimated using the full covariance matrix.  The cell esds are taken 
 into account individually in the estimation of esds in distances, angles 
 and torsion angles; correlations between esds in cell parameters are only 
 used when they are defined by crystal symmetry.  An approximate (isotropic) 
 treatment of cell esds is used for estimating esds involving l.s. planes. 
; 
 
loop_ 
 _geom_bond_atom_site_label_1 
 _geom_bond_atom_site_label_2 
 _geom_bond_distance 
 _geom_bond_site_symmetry_2 
 _geom_bond_publ_flag 
Mo1 O8 1.708(4) . ? 
Mo1 O9 1.731(4) . ? 
Mo1 O10 1.879(4) . ? 
Mo1 O1 1.929(4) . ? 
Mo1 O2 2.194(4) . ? 
Mo1 O4 2.327(4) . ? 
Mo1 K1 3.898(2) 2_646 ? 
Mo1 K2 4.012(3) . ? 
Mo2 O19 1.696(5) . ? 
Mo2 O18 1.701(5) . ? 
Mo2 O20 1.910(4) . ? 
Mo2 O10 1.950(4) . ? 
Mo2 O4 2.288(4) . ? 
Mo2 O15 2.316(4) . ? 
Mo3 O22 1.698(5) . ? 
Mo3 O23 1.706(5) . ? 
Mo3 O20 1.886(4) . ? 
Mo3 O21 1.974(4) . ? 
Mo3 O14 2.292(4) . ? 
Mo3 O5 2.318(4) . ? 
Mo4 O24 1.707(4) . ? 
Mo4 O25 1.727(4) . ? 
Mo4 O21 1.871(4) . ? 
Mo4 O11 1.955(4) . ? 
Mo4 O12 2.181(4) . ? 
Mo4 O14 2.317(4) . ? 
Mo4 K2 3.925(3) . ? 
Mo4 K1 3.951(2) 2_746 ? 
O1 C1 1.413(7) . ? 
O1 K2 3.417(5) . ? 
O2 C2 1.283(8) . ? 
O3 C2 1.220(8) . ? 
O4 C4 1.276(7) . ? 
O5 C4 1.239(6) . ? 
O6 C7 1.316(8) . ? 
O6 K1 3.042(5) 4_566 ? 
O7 C7 1.222(8) . ? 
O7 K2 3.071(6) 3_657 ? 
O8 K2 2.798(5) 3_657 ? 
O8 K1 3.002(5) 2_646 ? 
O9 K2 2.785(5) . ? 
O11 C11 1.416(6) . ? 
O11 K2 2.957(5) . ? 
O12 C12 1.273(7) . ? 
O12 K1 3.080(5) 2_746 ? 
O13 C12 1.223(7) . ? 
O14 C14 1.283(6) . ? 
O15 C14 1.249(6) . ? 
O16 C17 1.324(8) . ? 
O17 C17 1.211(8) . ? 
O17 K1 2.887(5) 2_746 ? 
O17 K2 3.047(6) 3_757 ? 
O23 K1 2.797(5) . ? 
O24 K1 2.846(5) 2_746 ? 
O24 K2 2.942(5) 3_757 ? 
O25 K2 2.924(5) . ? 
C1 C3 1.526(7) . ? 
C1 C2 1.536(8) . ? 
C1 C5 1.536(8) . ? 
C3 C4 1.505(8) . ? 
C5 C6 1.529(8) . ? 
C6 C7 1.499(9) . ? 
C11 C15 1.517(8) . ? 
C11 C13 1.529(7) . ? 
C11 C12 1.534(7) . ? 
C13 C14 1.493(8) . ? 
C15 C16 1.531(8) . ? 
C16 C17 1.485(8) . ? 
K1 O1W 2.807(7) . ? 
K1 O24 2.846(5) 2_756 ? 
K1 O17 2.887(5) 2_756 ? 
K1 O2W 2.939(9) 1_565 ? 
K1 O8 3.002(5) 2_656 ? 
K1 O6 3.042(5) 4_565 ? 
K1 O12 3.080(5) 2_756 ? 
K1 Mo1 3.898(2) 2_656 ? 
K1 Mo4 3.951(2) 2_756 ? 
K1 K2 4.102(4) 4_565 ? 
K2 O8 2.798(5) 3_657 ? 
K2 O24 2.942(5) 3_757 ? 
K2 O17 3.047(6) 3_757 ? 
K2 O7 3.071(6) 3_657 ? 
K2 K1 4.102(4) 4_566 ? 
O2W K1 2.939(9) 1_545 ? 
O6W O7W 1.41(4) . ? 
 
loop_ 
 _geom_angle_atom_site_label_1 
 _geom_angle_atom_site_label_2 
 _geom_angle_atom_site_label_3 
 _geom_angle 
 _geom_angle_site_symmetry_1 
 _geom_angle_site_symmetry_3 
 _geom_angle_publ_flag 
O8 Mo1 O9 102.7(2) . . ? 
O8 Mo1 O10 99.9(2) . . ? 
O9 Mo1 O10 101.00(19) . . ? 
O8 Mo1 O1 106.85(19) . . ? 
O9 Mo1 O1 93.54(18) . . ? 
O10 Mo1 O1 145.83(17) . . ? 
O8 Mo1 O2 92.2(2) . . ? 
O9 Mo1 O2 163.28(18) . . ? 
O10 Mo1 O2 83.56(18) . . ? 
O1 Mo1 O2 74.69(16) . . ? 
O8 Mo1 O4 166.8(2) . . ? 
O9 Mo1 O4 89.08(17) . . ? 
O10 Mo1 O4 71.65(15) . . ? 
O1 Mo1 O4 77.91(14) . . ? 
O2 Mo1 O4 77.01(15) . . ? 
O8 Mo1 K1 46.88(16) . 2_646 ? 
O9 Mo1 K1 82.07(14) . 2_646 ? 
O10 Mo1 K1 63.13(13) . 2_646 ? 
O1 Mo1 K1 150.37(12) . 2_646 ? 
O2 Mo1 K1 114.03(12) . 2_646 ? 
O4 Mo1 K1 130.97(10) . 2_646 ? 
O8 Mo1 K2 110.18(18) . . ? 
O9 Mo1 K2 35.29(14) . . ? 
O10 Mo1 K2 130.29(13) . . ? 
O1 Mo1 K2 58.25(12) . . ? 
O2 Mo1 K2 131.70(12) . . ? 
O4 Mo1 K2 82.84(10) . . ? 
K1 Mo1 K2 112.36(6) 2_646 . ? 
O19 Mo2 O18 104.7(3) . . ? 
O19 Mo2 O20 102.5(2) . . ? 
O18 Mo2 O20 97.4(2) . . ? 
O19 Mo2 O10 98.8(2) . . ? 
O18 Mo2 O10 98.0(2) . . ? 
O20 Mo2 O10 149.51(17) . . ? 
O19 Mo2 O4 164.3(2) . . ? 
O18 Mo2 O4 89.0(2) . . ? 
O20 Mo2 O4 82.75(16) . . ? 
O10 Mo2 O4 71.42(14) . . ? 
O19 Mo2 O15 87.3(2) . . ? 
O18 Mo2 O15 167.9(2) . . ? 
O20 Mo2 O15 81.60(17) . . ? 
O10 Mo2 O15 77.82(16) . . ? 
O4 Mo2 O15 78.84(13) . . ? 
O22 Mo3 O23 103.6(2) . . ? 
O22 Mo3 O20 99.6(2) . . ? 
O23 Mo3 O20 102.1(2) . . ? 
O22 Mo3 O21 98.5(2) . . ? 
O23 Mo3 O21 98.5(2) . . ? 
O20 Mo3 O21 148.38(16) . . ? 
O22 Mo3 O14 90.3(2) . . ? 
O23 Mo3 O14 163.7(2) . . ? 
O20 Mo3 O14 83.48(16) . . ? 
O21 Mo3 O14 70.66(14) . . ? 
O22 Mo3 O5 169.4(2) . . ? 
O23 Mo3 O5 86.44(19) . . ? 
O20 Mo3 O5 81.15(17) . . ? 
O21 Mo3 O5 76.51(15) . . ? 
O14 Mo3 O5 79.27(14) . . ? 
O24 Mo4 O25 103.2(2) . . ? 
O24 Mo4 O21 101.1(2) . . ? 
O25 Mo4 O21 102.70(18) . . ? 
O24 Mo4 O11 105.98(19) . . ? 
O25 Mo4 O11 90.40(17) . . ? 
O21 Mo4 O11 146.22(16) . . ? 
O24 Mo4 O12 90.00(19) . . ? 
O25 Mo4 O12 162.22(18) . . ? 
O21 Mo4 O12 86.01(17) . . ? 
O11 Mo4 O12 74.37(15) . . ? 
O24 Mo4 O14 165.65(19) . . ? 
O25 Mo4 O14 90.64(17) . . ? 
O21 Mo4 O14 71.74(15) . . ? 
O11 Mo4 O14 77.18(14) . . ? 
O12 Mo4 O14 77.25(15) . . ? 
O24 Mo4 K2 110.28(17) . . ? 
O25 Mo4 K2 43.49(15) . . ? 
O21 Mo4 K2 137.55(13) . . ? 
O11 Mo4 K2 46.92(12) . . ? 
O12 Mo4 K2 120.78(12) . . ? 
O14 Mo4 K2 82.29(10) . . ? 
O24 Mo4 K1 39.40(16) . 2_746 ? 
O25 Mo4 K1 139.85(14) . 2_746 ? 
O21 Mo4 K1 99.85(12) . 2_746 ? 
O11 Mo4 K1 88.90(11) . 2_746 ? 
O12 Mo4 K1 50.87(11) . 2_746 ? 
O14 Mo4 K1 128.10(10) . 2_746 ? 
K2 Mo4 K1 122.56(6) . 2_746 ? 
C1 O1 Mo1 119.5(3) . . ? 
C1 O1 K2 129.5(3) . . ? 
Mo1 O1 K2 93.05(14) . . ? 
C2 O2 Mo1 114.2(4) . . ? 
C4 O4 Mo2 130.4(3) . . ? 
C4 O4 Mo1 133.1(3) . . ? 
Mo2 O4 Mo1 93.73(13) . . ? 
C4 O5 Mo3 128.5(4) . . ? 
C7 O6 K1 158.1(4) . 4_566 ? 
C7 O7 K2 133.7(5) . 3_657 ? 
Mo1 O8 K2 157.1(3) . 3_657 ? 
Mo1 O8 K1 108.6(2) . 2_646 ? 
K2 O8 K1 89.94(15) 3_657 2_646 ? 
Mo1 O9 K2 123.7(2) . . ? 
Mo1 O10 Mo2 123.2(2) . . ? 
C11 O11 Mo4 119.0(3) . . ? 
C11 O11 K2 124.1(3) . . ? 
Mo4 O11 K2 104.21(15) . . ? 
C12 O12 Mo4 115.3(3) . . ? 
C12 O12 K1 117.3(3) . 2_746 ? 
Mo4 O12 K1 95.81(14) . 2_746 ? 
C14 O14 Mo3 131.4(3) . . ? 
C14 O14 Mo4 132.9(3) . . ? 
Mo3 O14 Mo4 94.38(13) . . ? 
C14 O15 Mo2 128.8(4) . . ? 
C17 O17 K1 130.8(4) . 2_746 ? 
C17 O17 K2 130.6(4) . 3_757 ? 
K1 O17 K2 87.41(14) 2_746 3_757 ? 
Mo3 O20 Mo2 145.2(2) . . ? 
Mo4 O21 Mo3 123.09(19) . . ? 
Mo3 O23 K1 136.2(3) . . ? 
Mo4 O24 K1 118.2(2) . 2_746 ? 
Mo4 O24 K2 134.4(2) . 3_757 ? 
K1 O24 K2 90.23(14) 2_746 3_757 ? 
Mo4 O25 K2 112.53(19) . . ? 
O1 C1 C3 110.0(4) . . ? 
O1 C1 C2 107.8(4) . . ? 
C3 C1 C2 109.0(5) . . ? 
O1 C1 C5 108.5(4) . . ? 
C3 C1 C5 110.0(5) . . ? 
C2 C1 C5 111.5(5) . . ? 
O3 C2 O2 125.0(6) . . ? 
O3 C2 C1 120.7(6) . . ? 
O2 C2 C1 114.3(5) . . ? 
C4 C3 C1 115.0(5) . . ? 
O5 C4 O4 122.9(5) . . ? 
O5 C4 C3 118.9(5) . . ? 
O4 C4 C3 118.2(5) . . ? 
C6 C5 C1 114.4(5) . . ? 
C7 C6 C5 115.0(5) . . ? 
O7 C7 O6 121.8(6) . . ? 
O7 C7 C6 123.9(6) . . ? 
O6 C7 C6 114.2(6) . . ? 
O11 C11 C15 108.2(4) . . ? 
O11 C11 C13 109.5(4) . . ? 
C15 C11 C13 110.2(4) . . ? 
O11 C11 C12 107.8(4) . . ? 
C15 C11 C12 111.9(5) . . ? 
C13 C11 C12 109.3(4) . . ? 
O13 C12 O12 124.7(5) . . ? 
O13 C12 C11 120.9(5) . . ? 
O12 C12 C11 114.4(5) . . ? 
C14 C13 C11 115.1(4) . . ? 
O15 C14 O14 122.2(5) . . ? 
O15 C14 C13 119.1(5) . . ? 
O14 C14 C13 118.7(5) . . ? 
C11 C15 C16 112.5(5) . . ? 
C17 C16 C15 114.3(5) . . ? 
O17 C17 O16 122.5(6) . . ? 
O17 C17 C16 124.2(6) . . ? 
O16 C17 C16 113.3(6) . . ? 
O23 K1 O1W 69.54(17) . . ? 
O23 K1 O24 129.43(14) . 2_756 ? 
O1W K1 O24 150.35(19) . 2_756 ? 
O23 K1 O17 88.51(15) . 2_756 ? 
O1W K1 O17 143.98(19) . 2_756 ? 
O24 K1 O17 65.30(14) 2_756 2_756 ? 
O23 K1 O2W 100.1(2) . 1_565 ? 
O1W K1 O2W 80.4(2) . 1_565 ? 
O24 K1 O2W 74.1(2) 2_756 1_565 ? 
O17 K1 O2W 133.0(2) 2_756 1_565 ? 
O23 K1 O8 163.94(17) . 2_656 ? 
O1W K1 O8 103.18(17) . 2_656 ? 
O24 K1 O8 63.65(13) 2_756 2_656 ? 
O17 K1 O8 90.17(14) 2_756 2_656 ? 
O2W K1 O8 92.5(2) 1_565 2_656 ? 
O23 K1 O6 93.37(15) . 4_565 ? 
O1W K1 O6 68.23(19) . 4_565 ? 
O24 K1 O6 124.39(15) 2_756 4_565 ? 
O17 K1 O6 85.67(14) 2_756 4_565 ? 
O2W K1 O6 138.8(2) 1_565 4_565 ? 
O8 K1 O6 70.57(15) 2_656 4_565 ? 
O23 K1 O12 78.29(13) . 2_756 ? 
O1W K1 O12 121.28(18) . 2_756 ? 
O24 K1 O12 55.57(12) 2_756 2_756 ? 
O17 K1 O12 79.05(13) 2_756 2_756 ? 
O2W K1 O12 58.26(19) 1_565 2_756 ? 
O8 K1 O12 117.14(14) 2_656 2_756 ? 
O6 K1 O12 162.71(14) 4_565 2_756 ? 
O23 K1 Mo1 146.91(11) . 2_656 ? 
O1W K1 Mo1 79.04(14) . 2_656 ? 
O24 K1 Mo1 83.46(9) 2_756 2_656 ? 
O17 K1 Mo1 112.59(11) 2_756 2_656 ? 
O2W K1 Mo1 84.2(2) 1_565 2_656 ? 
O8 K1 Mo1 24.53(8) 2_656 2_656 ? 
O6 K1 Mo1 64.68(10) 4_565 2_656 ? 
O12 K1 Mo1 129.02(10) 2_756 2_656 ? 
O23 K1 Mo4 108.44(11) . 2_756 ? 
O1W K1 Mo4 146.45(17) . 2_756 ? 
O24 K1 Mo4 22.38(8) 2_756 2_756 ? 
O17 K1 Mo4 66.65(10) 2_756 2_756 ? 
O2W K1 Mo4 66.79(18) 1_565 2_756 ? 
O8 K1 Mo4 85.63(10) 2_656 2_756 ? 
O6 K1 Mo4 143.53(12) 4_565 2_756 ? 
O12 K1 Mo4 33.32(8) 2_756 2_756 ? 
Mo1 K1 Mo4 103.42(4) 2_656 2_756 ? 
O23 K1 K2 135.94(13) . 4_565 ? 
O1W K1 K2 140.60(16) . 4_565 ? 
O24 K1 K2 45.84(11) 2_756 4_565 ? 
O17 K1 K2 47.91(11) 2_756 4_565 ? 
O2W K1 K2 114.0(2) 1_565 4_565 ? 
O8 K1 K2 43.01(9) 2_656 4_565 ? 
O6 K1 K2 79.19(12) 4_565 4_565 ? 
O12 K1 K2 96.19(10) 2_756 4_565 ? 
Mo1 K1 K2 67.04(5) 2_656 4_565 ? 
Mo4 K1 K2 64.74(6) 2_756 4_565 ? 
O9 K2 O8 90.75(16) . 3_657 ? 
O9 K2 O25 90.54(14) . . ? 
O8 K2 O25 155.7(2) 3_657 . ? 
O9 K2 O24 155.63(17) . 3_757 ? 
O8 K2 O24 65.00(14) 3_657 3_757 ? 
O25 K2 O24 110.45(15) . 3_757 ? 
O9 K2 O11 86.97(13) . . ? 
O8 K2 O11 151.49(19) 3_657 . ? 
O25 K2 O11 52.85(11) . . ? 
O24 K2 O11 115.31(16) 3_757 . ? 
O9 K2 O17 119.05(18) . 3_757 ? 
O8 K2 O17 90.98(16) 3_657 3_757 ? 
O25 K2 O17 67.31(14) . 3_757 ? 
O24 K2 O17 62.16(14) 3_757 3_757 ? 
O11 K2 O17 114.88(15) . 3_757 ? 
O9 K2 O7 67.24(14) . 3_657 ? 
O8 K2 O7 65.95(15) 3_657 3_657 ? 
O25 K2 O7 135.99(16) . 3_657 ? 
O24 K2 O7 102.43(16) 3_757 3_657 ? 
O11 K2 O7 87.11(15) . 3_657 ? 
O17 K2 O7 156.67(17) 3_757 3_657 ? 
O9 K2 O1 49.74(12) . . ? 
O8 K2 O1 84.75(16) 3_657 . ? 
O25 K2 O1 77.63(13) . . ? 
O24 K2 O1 121.19(15) 3_757 . ? 
O11 K2 O1 114.42(13) . . ? 
O17 K2 O1 69.82(13) 3_757 . ? 
O7 K2 O1 109.43(14) 3_657 . ? 
O9 K2 Mo4 89.08(11) . . ? 
O8 K2 Mo4 179.59(18) 3_657 . ? 
O25 K2 Mo4 23.98(8) . . ? 
O24 K2 Mo4 115.15(12) 3_757 . ? 
O11 K2 Mo4 28.87(7) . . ? 
O17 K2 Mo4 88.77(11) 3_757 . ? 
O7 K2 Mo4 114.31(13) 3_657 . ? 
O1 K2 Mo4 94.86(10) . . ? 
O9 K2 Mo1 21.05(9) . . ? 
O8 K2 Mo1 87.73(13) 3_657 . ? 
O25 K2 Mo1 84.82(11) . . ? 
O24 K2 Mo1 144.57(14) 3_757 . ? 
O11 K2 Mo1 99.51(10) . . ? 
O17 K2 Mo1 98.27(13) 3_757 . ? 
O7 K2 Mo1 84.88(12) 3_657 . ? 
O1 K2 Mo1 28.69(7) . . ? 
Mo4 K2 Mo1 91.98(6) . . ? 
O9 K2 K1 117.47(14) . 4_566 ? 
O8 K2 K1 47.05(11) 3_657 4_566 ? 
O25 K2 K1 111.97(12) . 4_566 ? 
O24 K2 K1 43.93(10) 3_757 4_566 ? 
O11 K2 K1 153.01(12) . 4_566 ? 
O17 K2 K1 44.69(10) 3_757 4_566 ? 
O7 K2 K1 111.98(13) 3_657 4_566 ? 
O1 K2 K1 78.19(10) . 4_566 ? 
Mo4 K2 K1 132.76(9) . 4_566 ? 
Mo1 K2 K1 101.01(9) . 4_566 ? 
 
_diffrn_measured_fraction_theta_max    0.953 
_diffrn_reflns_theta_full              28.37 
_diffrn_measured_fraction_theta_full   0.953 
_refine_diff_density_max    1.413 
_refine_diff_density_min   -2.147 
_refine_diff_density_rms    0.185 
